# Supplementary material
Source: Springer Nature journal article supplement (https://www.springermedizin.de/resource/supplementary/13019_2008_172_MOESM1_ESM.pdf/9638144)
Supplement: MOESM1 [file 9638144]

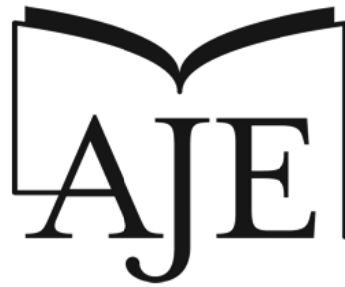

www.journalexperts.com

## American Journal Experts Editorial Certification

This document certifies that the manuscript titled "Magnesium sulphate and amiodarone prophylaxis for prevention of postoperative arrhythmia in coronary by-pass operations" was edited for proper English language, grammar, punctuation, spelling, and overall style by one or more of the highly qualified native English speaking editors at American Journal Experts. Neither the research content nor the authors' intentions were altered in any way during the editing process.

Documents receiving this certification should be English-ready for publication - however, the author has the ability to accept or reject our suggestions and changes. To verify the final AJE edited version, please visit our verification page. If you have any questions or concerns over this edited document, please contact American Journal Experts at [support@journalexperts.com](mailto:support@journalexperts.com)

**Manuscript title:** Magnesium sulphate and amiodarone prophylaxis for prevention of postoperative arrhythmia in coronary by-pass operations

**Authors:** Osman Tiryakioglu

**Key:** 7D33-8A69-A3F7-2229-A757

This certificate may be verified at [www.journalexperts.com/certificate](http://www.journalexperts.com/certificate)

American Journal Experts is an association of Ph.Ds and Ph.D. graduate students from America's top 10 research universities. Our editors come from nearly every research field and possess the highest qualifications to edit research manuscripts written by non-native English speakers. We provide the quickest turnaround times at the lowest prices in the industry. For more information, please visit [www.journalexperts.com](http://www.journalexperts.com), or for volume discounts for academic journals, please contact us by email at [sales@journalexperts.com](mailto:sales@journalexperts.com)
